# Supplementary material
Source: PubMed Central journal article supplement (PMC3083790)
Supplement: JCI45666sd.pdf [file JCI45666sd.pdf]

**Supplementary table 1:** Demographic data of clinical study group

| <b>Variable</b>    | <b>Controls<br/>(n=32)</b> | <b>TB Cases<br/>(n=33)</b> | <b>Total (n=65)</b> |
|--------------------|----------------------------|----------------------------|---------------------|
| <i>Sex</i>         |                            |                            |                     |
| Male               | 16 (50.0%)                 | 24 (72.7%)                 | 40 (61.5%)          |
| <i>Ethnicity</i>   |                            |                            |                     |
| Caucasian          | 21 (65.6%)                 | 11 (33.3%)                 | 32 (49.2%)          |
| Black              | 5 (15.6%)                  | 12 (36.3%)                 | 17 (26.1%)          |
| Asian              | 6 (18.7%)                  | 10 (30.3%)                 | 16 (24.6%)          |
| <i>Age</i>         |                            |                            |                     |
| <35                | 14 (43.8%)                 | 24 (72.7%)                 | 38 (58.5%)          |
| 36-45              | 5 (15.6%)                  | 4 (12.1%)                  | 9 (13.8%)           |
| >45 years          | 13 (40.6%)                 | 5 (15.1%)                  | 18 (27.7%)          |
| <i>Sample type</i> |                            |                            |                     |
| BALF               | 18                         | 7                          | 25                  |
| Induced sputum     | 14                         | 26                         | 40                  |

**Supplementary table 2:** Final diagnosis of respiratory symptomatics investigated for possible TB. In all cases, cultures for Mtb were negative and all patients remained clear of TB on follow up for a minimum of 24 months.

| <b>Final Diagnosis</b>         | <b>Number</b> |
|--------------------------------|---------------|
| Community Acquired Pneumonia   | 8             |
| Sarcoidosis                    | 8             |
| No diagnosis made              | 4             |
| Lymphoma                       | 3             |
| Haemoptysis of uncertain cause | 3             |
| Bronchiectasis                 | 2             |
| Fungal pneumonia               | 2             |
| Lung cancer                    | 1             |
| Non-tuberculous mycobacteria   | 1             |

**Supplementary table 3:** Median values and 25<sup>th</sup> and 75<sup>th</sup> percentiles for MMPs, TIMPs and cytokines. Values are pg/mg total protein.

|               | Non TB (25 <sup>th</sup> – 75 <sup>th</sup> ) | TB (25 <sup>th</sup> – 75 <sup>th</sup> ) |
|---------------|-----------------------------------------------|-------------------------------------------|
| MMP-1         | 26.7806 (11.24 - 113.98)                      | 417.9827 (34.96 - 873.11)                 |
| MMP-2         | 1697.284 (74.68 - 5679.06)                    | 1284.865 (79.20 - 3402.49)                |
| MMP-3         | 87.8872 (10.56 - 213.51)                      | 319.536 (143.61 - 902.33)                 |
| MMP-7         | 32255 (7693.31 - 54801.31)                    | 28880.35 (18048.87 - 64499.11)            |
| MMP-8         | 59457.16 (17980.67 - 244018.3)                | 172338.6 (21206.96 - 294573.30)           |
| MMP-9         | 18017.47 (1581.69 - 75856.58)                 | 23110.33 (4116.97 - 104639.60)            |
| MMP-12        | 3.3241 (2.02 - 7.30)                          | 3.7417 (2.35 - 133.53)                    |
| TIMP-1        | 34692.82 (8.76 - 151206.5)                    | 7390.411 (8.62 - 43870.96)                |
| TIMP-2        | 17340.28 (102.75 - 75180.32)                  | 125.0354 (67.63 - 12551.86)               |
| TNF- $\alpha$ | 7.495 (1.49 - 20.49)                          | 3.0416 (0.06 - 11.55)                     |
| IFN- $\gamma$ | 14.4176 (8.04 - 37.77)                        | 16.9775 (7.50 - 33.18)                    |
| IL-1 $\beta$  | 27.1843 (3.68 - 134.15)                       | 63.0796 (17.31 - 152.99)                  |

**Supplementary table 4:** Comparison of patients with TB and non-TB respiratory symptomatics analyzed by method of sample collection by Mann Whitney U Test.

Despite the small sample size, MMP-1 is persistently increased in each group.

| <b>Variable</b> | <b>BALF<br/>P value</b> | <b>Induced<br/>Sputum<br/>P value</b> | <b>BALF +<br/>Induced<br/>sputum<br/>P value</b> |
|-----------------|-------------------------|---------------------------------------|--------------------------------------------------|
| MMP1            | <b><i>0.0011</i></b>    | <b><i>0.021</i></b>                   | <b><i>0.0001</i></b>                             |
| MMP 2           | 0.7165                  | 0.0837                                | 0.8337                                           |
| MMP3            | 0.1022                  | <b><i>0.0071</i></b>                  | <b><i>0.0007</i></b>                             |
| MMP7            | 0.1303                  | 0.335                                 | 0.4705                                           |
| MMP8            | 0.9037                  | 0.2337                                | 0.3937                                           |
| MMP9            | 0.8559                  | 0.1189                                | 0.3515                                           |
| MMP12           | 0.7392                  | 0.1329                                | 0.2199                                           |
| TIMP1           | 0.1303                  | 0.2835                                | <b><i>0.0418</i></b>                             |
| TIMP2           | 0.1156                  | 0.7886                                | <b><i>0.0053</i></b>                             |
| TNF- $\alpha$   | 0.586                   | 0.65                                  | 0.1895                                           |
| IFN- $\gamma$   | 0.586                   | 0.4962                                | 0.8235                                           |
| IL-1 $\beta$    | 0.3968                  | 0.8205                                | 0.093                                            |

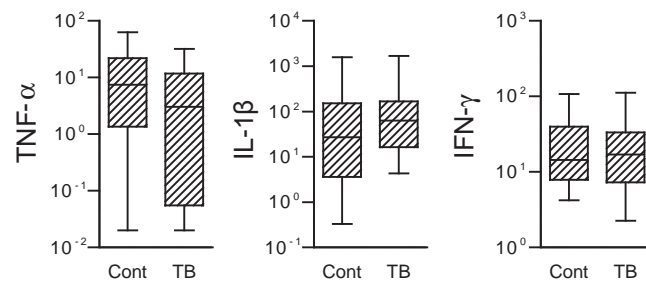

Supplementary figure 1. No differences in TNF- $\alpha$ , IL-1 $\beta$  and IFN- $\gamma$  concentrations in induced sputum and broncho-alveolar lavage were demonstrated between respiratory symptomatic and patients with TB, analyzed by Mann-Whitney U test.

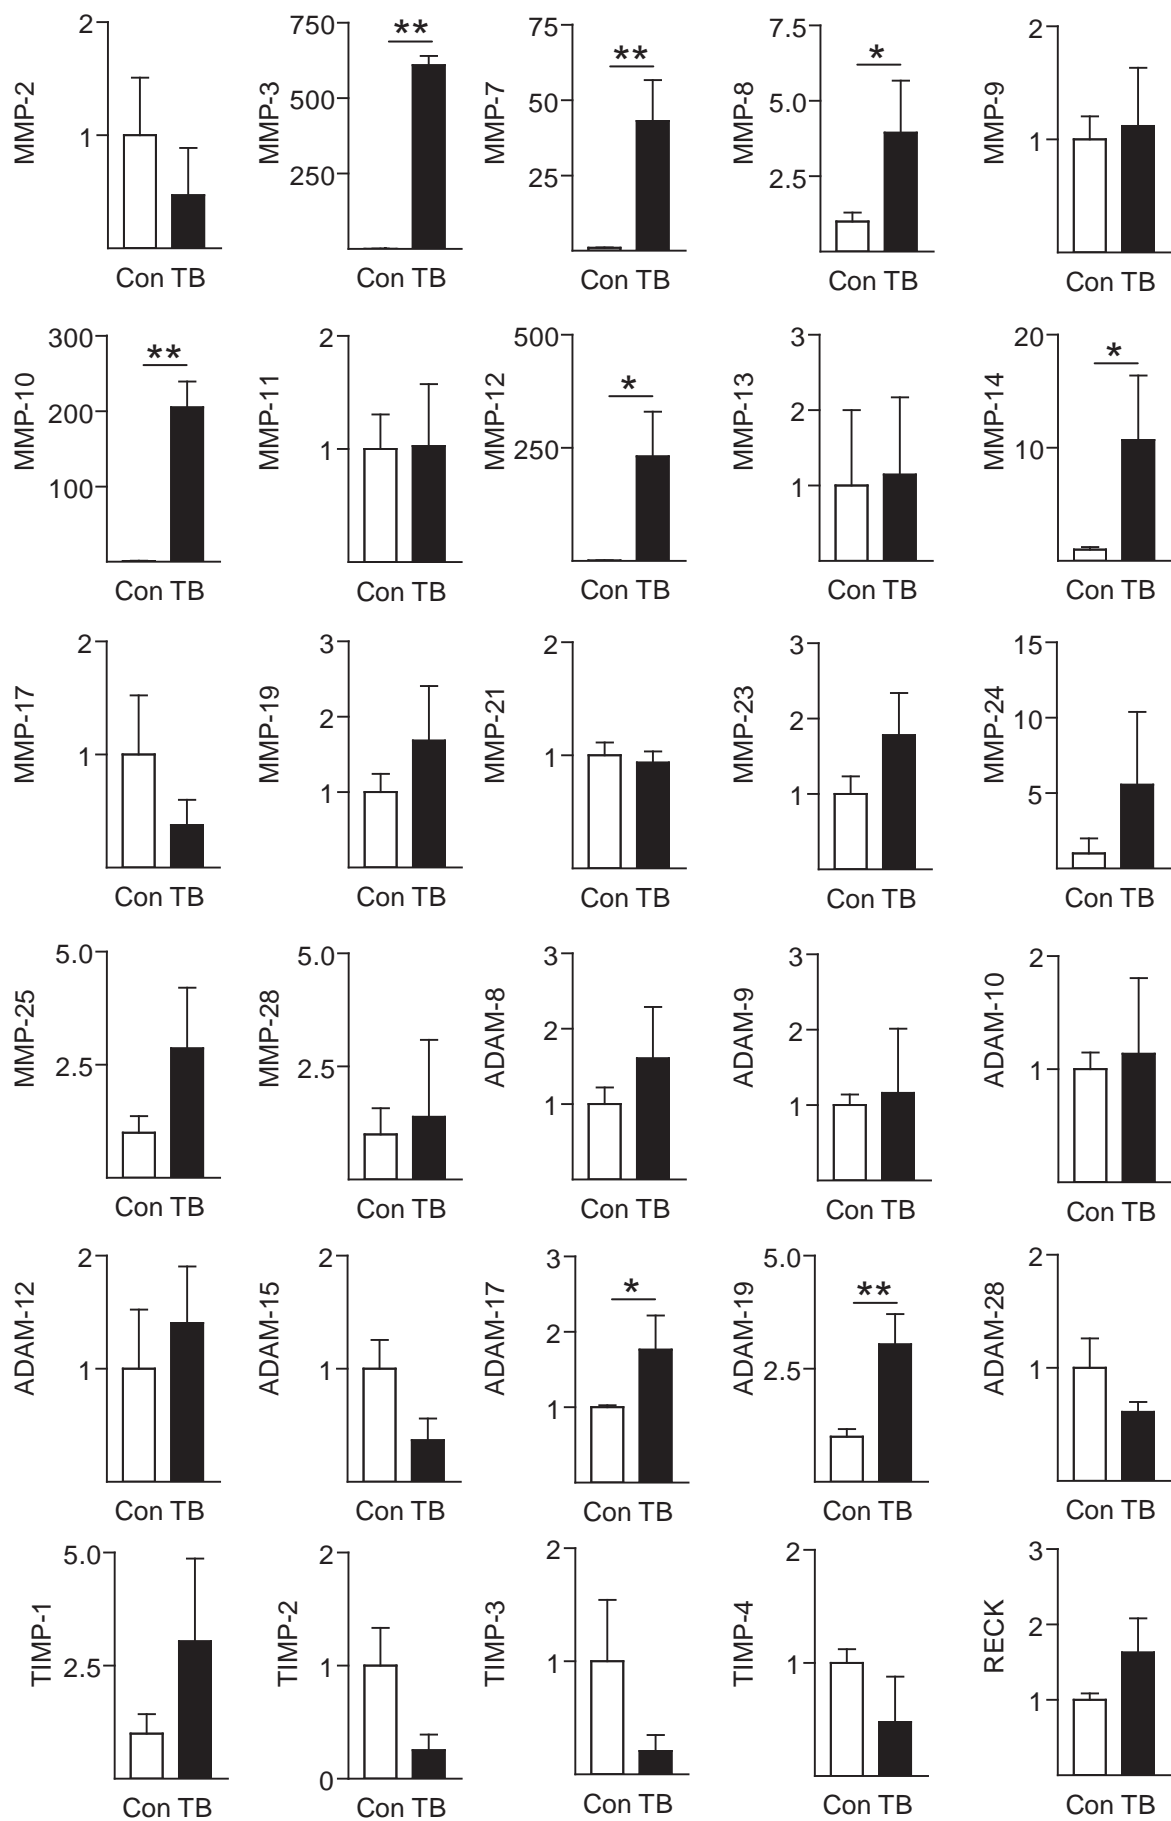

Supplementary figure 2. Mean mRNA up-regulation per donor is shown. MMP-15, -16, -20, -26, -27 and ADAM-33 were undetectable. For MMP-3, -12, -13 and -24, up-regulation relative to average control monocyte mRNA levels is expressed since mRNA was undetectable in uninfected cells in some donors.

\* P < 0.05, \*\* P < 0.01 by Student's t-test.

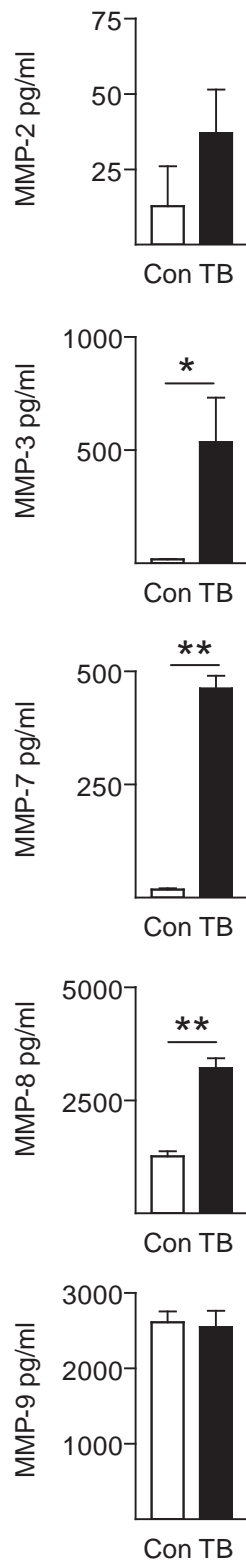

Supplementary figure 3. MMP secretion by control and Mtb-infected primary human monocytes analyzed at 24h post infection. Mtb significantly up-regulates MMP-3, MMP-7 and MMP-8 secretion.

\* P < 0.05, \*\* P < 0.01 by Student's t-test.

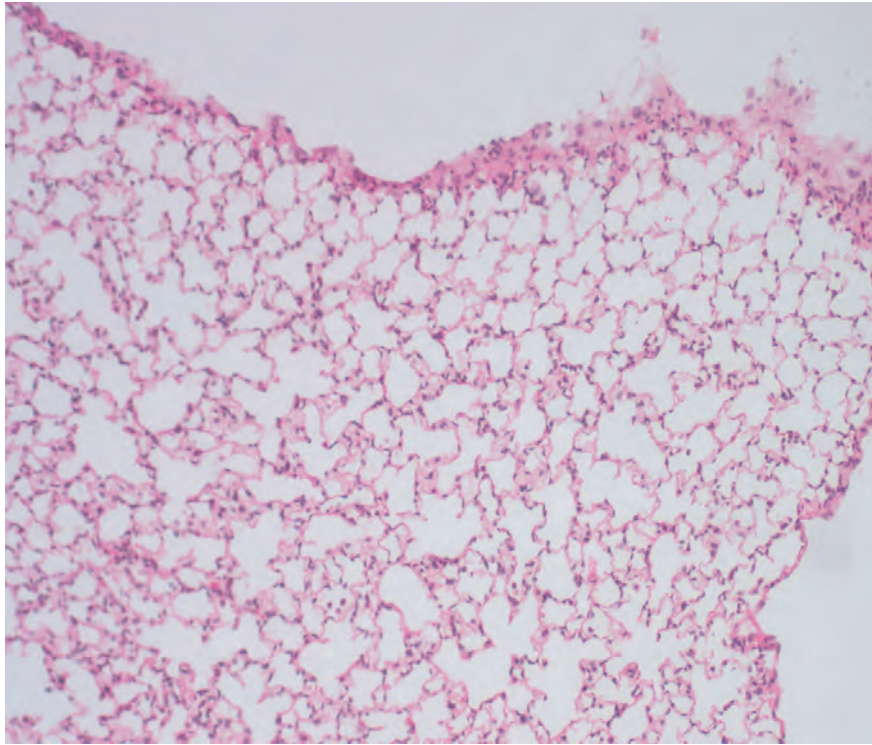

**Supplementary figure 4.** Lung architecture is normal in uninfected MMP-1 expressing mice. MMP-1 is regulated by the scavenger receptor A promoter-enhancer. Consequently, expression levels in uninfected lung tissue are very low.



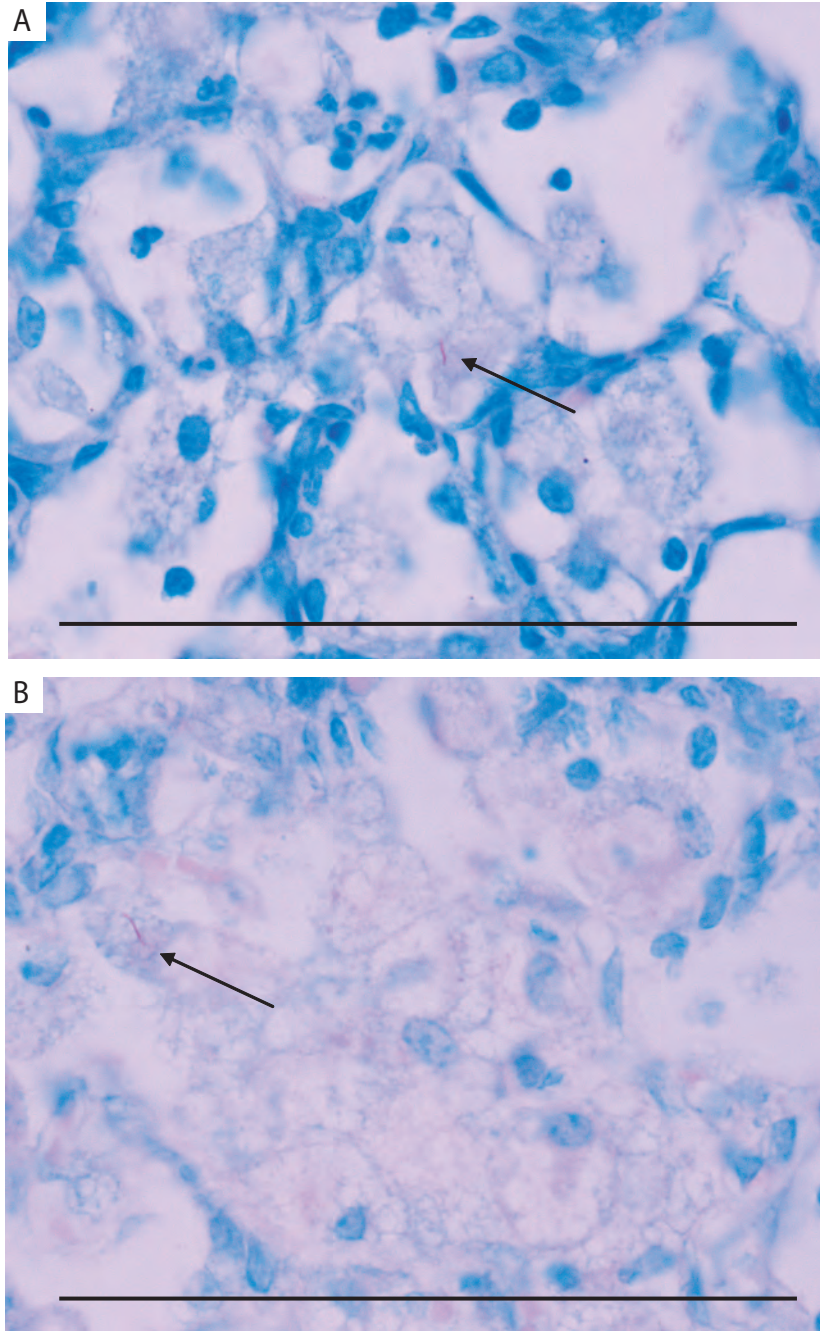

**Supplementary figure 5.** High resolution image of Ziehl-Neelsen staining in Fig. 5, panels J and K. Acid-fast bacilli are demonstrated in infected macrophages in wild type (A) and MMP-1 expressing mice (B). Scale bars 50 $\mu$ m.

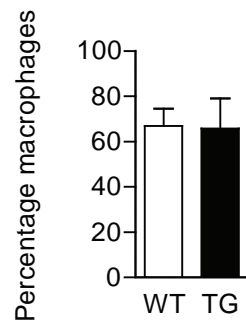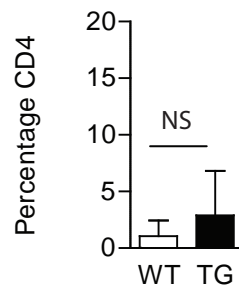

**Supplementary figure 6.** Inflammatory cell recruitment to the TB granuloma does not differ between wild type and MMP-1 mice. Paraffin-fixed sections were stained for total leukocyte infiltration, macrophages and CD4+ T cells as described in methods. Total inflammatory cells, macrophages and CD4 cells were scored by a pathologist blinded to the mouse genotype. No significant difference in cellular recruitment to the granuloma was demonstrated.
